# Supplementary material for: Knockdown of Heparanase Suppresses Invasion of Human Trophoblasts by Activating p38 MAPK Signaling Pathway
Source: Hindawi journal article supplement (doi:10.1155/2018/7413027), 2018-01-01

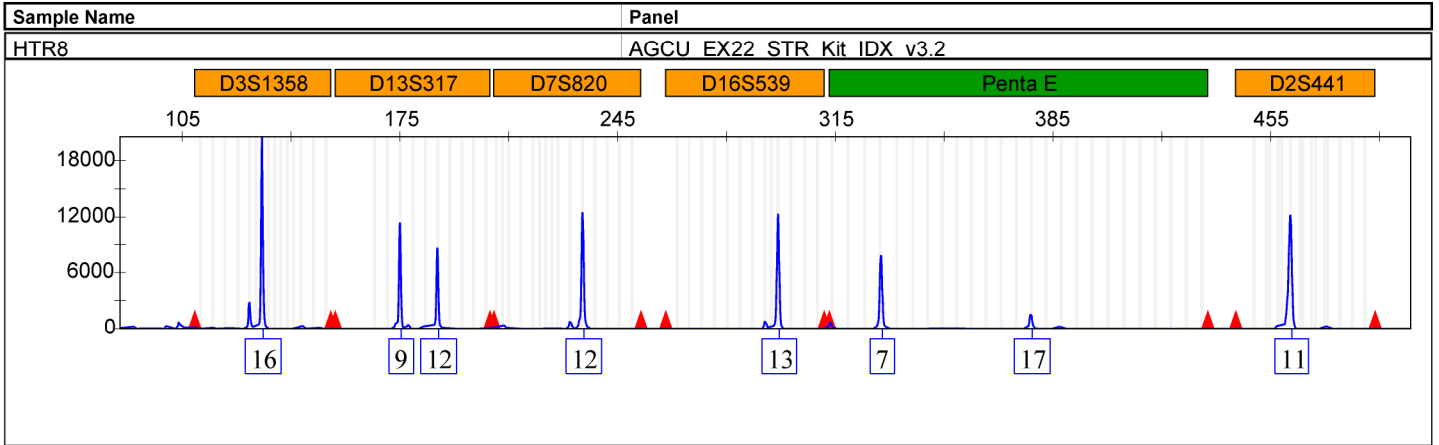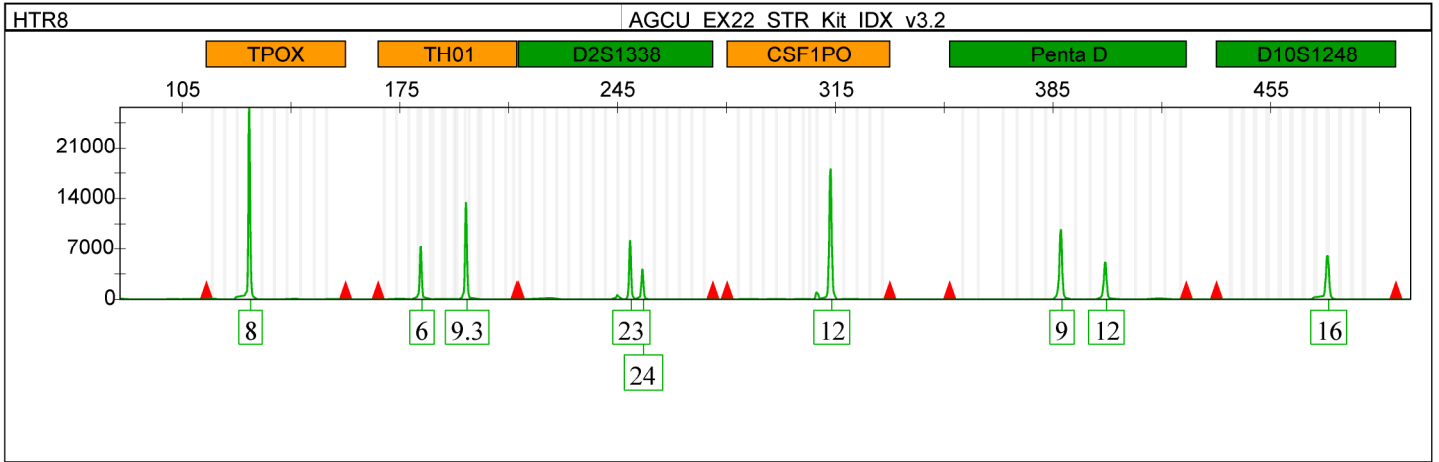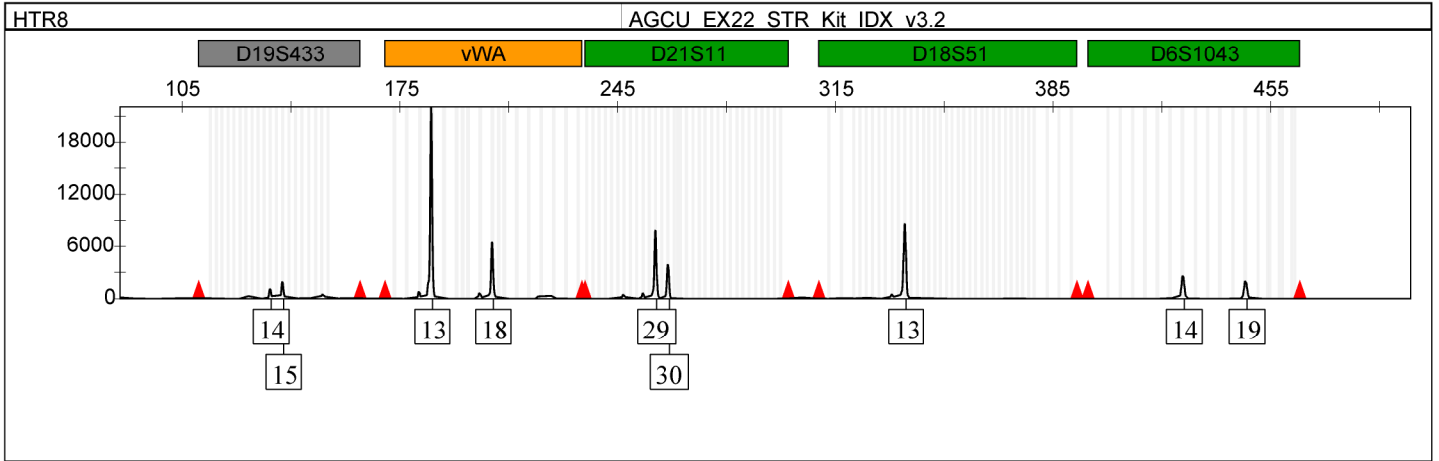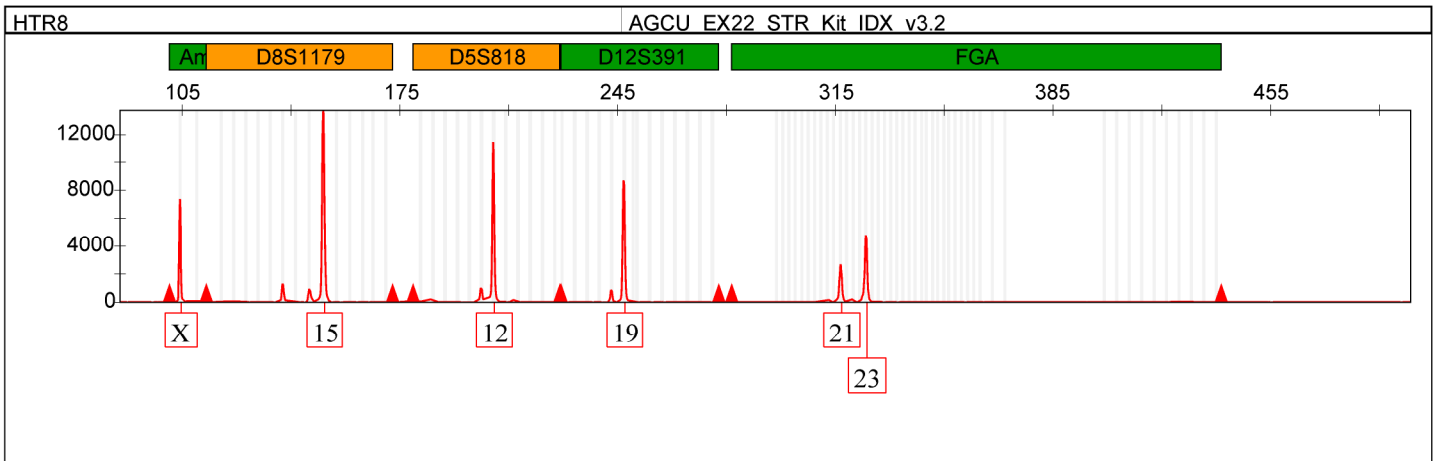

Supplement: f1 [file 7413027.f1.pdf]
